# Supplementary material for: Using biomarkers to predict progression from clinically isolated syndrome to multiple sclerosis
Source: PubMed Central journal article supplement (PMC3850501; doi:10.1186/2043-9113-3-18), 2013-10-03
Supplement: 2043-9113-3-18-S3.pdf [file 2043-9113-3-18-S3.pdf]

## MS versus OND-I

## MS versus OND-NI

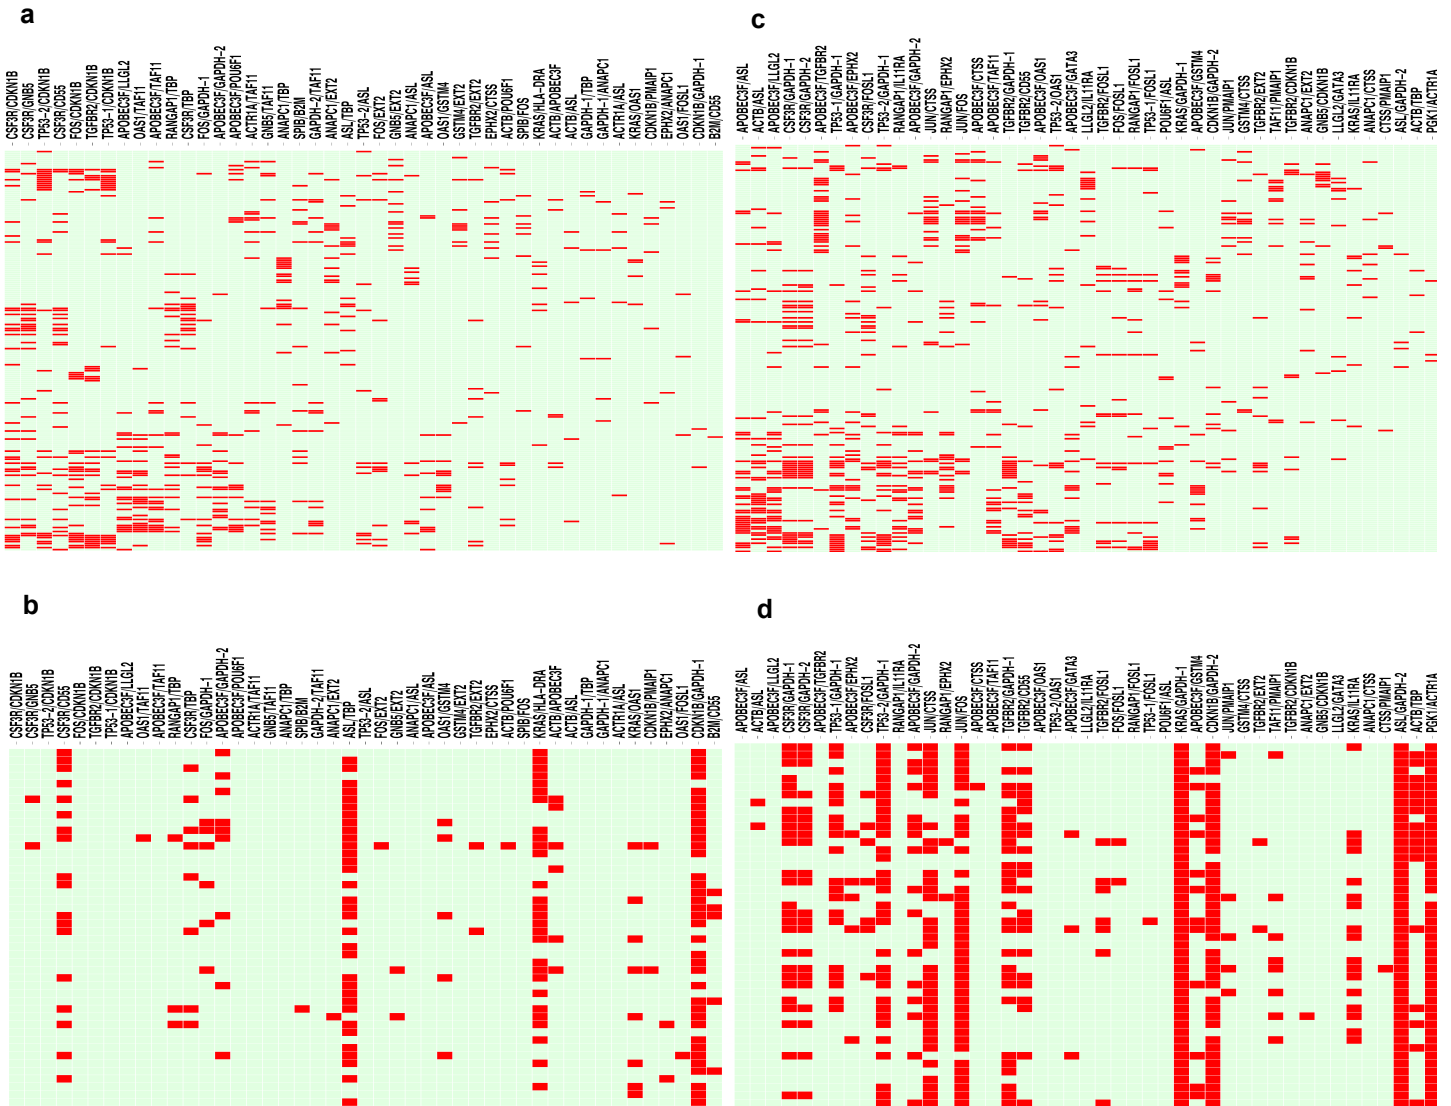

**Supplementary Fig. 3.** Ratios making up the ratioscore that discriminate MS from OND-I or OND-NI. **a.** Optimum ratios to discriminate MS from OND-I. **b.** Results for individual CIS → MS subjects using the MS : OND-I ratioscore. **c.** Optimum ratios to discriminate MS from OND-NI. **d.** Results for individual CIS → MS subjects using the MS : OND-NI ratioscore.
